# Supplementary material for: From bis(imidazole-2-thion-4-yl)phosphane to a flexible P-bridged bis(NHC) ligand and its silver complex
Source: Royal Society of Chemistry journal article supplement (doi:10.1039/c4dt02479f), 2014-01-01
Supplement: c4dt02479f1.pdf [file c4dt02479f1.pdf]

## From bis(imidazole-2-thion-4-yl)phosphane to a flexible P-bridged bis(NHC) ligand and its silver complex

Paresh Kumar Majhi, Gregor Schnakenburg and Rainer Streubel\*

Table S1. Crystal data and structure refinement for **3**

|                                   |                                                                 |                            |
|-----------------------------------|-----------------------------------------------------------------|----------------------------|
| Device Type                       | Bruker X8-KappaApexII                                           |                            |
| Empirical formula                 | C <sub>22</sub> H <sub>31</sub> N <sub>4</sub> OPS <sub>2</sub> |                            |
| Moiety formula                    | C <sub>22</sub> H <sub>31</sub> N <sub>4</sub> OPS <sub>2</sub> |                            |
| Formula weight                    | 462.60                                                          |                            |
| Temperature                       | 100(2) K                                                        |                            |
| Wavelength                        | 0.71073 Å                                                       |                            |
| Crystal system                    | Monoclinic                                                      |                            |
| Space group                       | <i>P</i> 2 <sub>1</sub> / <i>c</i>                              |                            |
| Unit cell dimensions              | a = 11.2305(9) Å                                                | $\alpha = 90^\circ$        |
|                                   | b = 19.7226(17) Å                                               | $\beta = 104.669(3)^\circ$ |
|                                   | c = 11.1563(10) Å                                               | $\gamma = 90^\circ$        |
| Volume, Z                         | 2390.5(4) Å <sup>3</sup> , 4                                    |                            |
| Calculated density                | 1.285 mg/m <sup>3</sup>                                         |                            |
| Absorption coefficient            | 0.311 mm <sup>-1</sup>                                          |                            |
| F(000)                            | 984                                                             |                            |
| Crystal size                      | 0.09 × 0.06 × 0.02 mm                                           |                            |
| Theta range for data collection   | 3.78 to 28.00°                                                  |                            |
| Limiting indices                  | -14 ≤ h ≤ 11, -25 ≤ k ≤ 23, -10 ≤ l ≤ 14                        |                            |
| Reflections collected / unique    | 12276 / 5725 [R(int) = 0.0430]                                  |                            |
| Completeness to theta = 28.00     | 99.1 %                                                          |                            |
| Absorption correction             | Empirical                                                       |                            |
| Max. and min. transmission        | 0.9938 and 0.9726                                               |                            |
| Refinement method                 | Full-matrix least-squares on F <sup>2</sup>                     |                            |
| Data / restraints / parameters    | 5725 / 0 / 279                                                  |                            |
| Goodness-of-fit on F <sup>2</sup> | 1.019                                                           |                            |
| Final R indices [I > 2σ(I)]       | R <sub>1</sub> = 0.0421, wR <sub>2</sub> = 0.0884               |                            |
| R indices (all data)              | R <sub>1</sub> = 0.0774, wR <sub>2</sub> = 0.0999               |                            |
| Largest diff. peak and hole       | 0.509 and -0.382 e.Å <sup>-3</sup>                              |                            |
